# Supplementary material for: Structural reliability evaluation of low-k nanoporous dielectric interlayers integrated into microelectronic devices
Source: Royal Society of Chemistry journal article supplement (doi:10.1039/c5ra16983f), 2015-01-01
Supplement: c5ra16983f1.pdf [file c5ra16983f1.pdf]

## Supplementary Information

### Structural reliability evaluation for low-*k* nanoporous dielectric interlayers integrated into microelectronic device

Kyuyoung Heo,<sup>a</sup> Brian J. Ree,<sup>a</sup> Kyeong-Keun Choi<sup>b</sup> and Moonhor Ree<sup>a</sup>

<sup>a</sup>Department of Chemistry, Division of Advanced Materials Science, Pohang Accelerator Laboratory, Polymer Research Institute, and BK School of Molecular Science, Pohang University of Science & Technology, Pohang 790-784, Republic of Korea

<sup>b</sup>National Institute for Nanomaterials Technology, Pohang University of Science & Technology, Pohang 790-784, Republic of Korea

#### GIXS Data Analysis

The intensity of GIXS ( $I_{\text{GIXS}}$ ) from structures in a thin film can be expressed by a scattering formula:<sup>1-5</sup>

$$I_{\text{GIXS}}(\alpha_f, 2\theta_f) \cong \frac{1}{16\pi^2} \cdot \frac{1 - e^{-2\text{Im}(q_z)t}}{2\text{Im}(q_z)} \cdot \left[ \begin{array}{l} |T_i T_f|^2 I_1(q_{\parallel}, \text{Re}(q_{1,z})) + \\ |T_i R_f|^2 I_1(q_{\parallel}, \text{Re}(q_{2,z})) + \\ |T_f R_i|^2 I_1(q_{\parallel}, \text{Re}(q_{3,z})) + \\ |R_i R_f|^2 I_1(q_{\parallel}, \text{Re}(q_{4,z})) \end{array} \right] \quad (1)$$

where  $\alpha_f$  and  $2\theta_f$  are the out-of-plane and in-plane exit angle of the out-going X-ray beam respectively,  $\text{Im}(q_z) = |\text{Im}(\mathbf{k}_{z,f})| + |\text{Im}(\mathbf{k}_{z,i})|$ ,  $\text{Re}(x)$  is the real part of  $x$ ,  $t$  is the film thickness,  $R_i$  and  $T_i$

are the reflected and transmitted amplitudes of the incoming X-ray beam respectively, and  $R_f$  and  $T_f$  are the reflected and transmitted amplitudes of the outgoing X-ray beam respectively. In addition,  $q_{||} = \sqrt{q_x^2 + q_y^2}$ ,  $q_{1,z} = k_{z,f} - k_{z,i}$ ,  $q_{2,z} = -k_{z,f} - k_{z,i}$ ,  $q_{3,z} = k_{z,f} + k_{z,i}$ , and  $q_{4,z} = -k_{z,f} + k_{z,i}$ ; here,  $k_{z,i}$  is the  $z$ -component of the wave vector of the incoming X-ray beam, which is given by  $k_{z,i} = k_o \sqrt{n_R^2 - \cos^2 \alpha_i}$ , and  $k_{z,f}$  is the  $z$ -component of the wave vector of the outgoing X-ray beam, which is given by  $k_{z,f} = k_o \sqrt{n_R^2 - \cos^2 \alpha_f}$ , where  $k_o = 2\pi/\lambda$ ,  $\lambda$  is the wavelength of the X-ray beam,  $n_R$  is the refractive index of the film given by  $n_R = 1 - \delta + i\zeta$  with dispersion  $\delta$  and absorption  $\zeta$ , and  $\alpha_i$  is the out-of-plane grazing incident angle of the incoming X-ray beam.  $q_x$ ,  $q_y$ , and  $q_z$  are the components of the scattering vector  $\mathbf{q}$ .  $I_1$  is the scattering intensity of the structure in the film, which can be calculated kinematically.

In eq 1,  $I_1$  is the scattered intensity from morphological structures (i.e., pores) in the low- $k$  layer. To analyze the measured scattering patterns by using the above GIXS formula, we examined all possible scattering models, for examples, sphere, ellipsoid, cylinder, and so on. Then we found that a sphere model is the most suitable for the pores imprinted in the low- $k$  layers, which can be expressed in the following equation:<sup>1-7</sup>

$$I_1 = c \int_0^\infty n(r) \nu^2(r) |F(qr)|^2 S(qr) dr \quad (2)$$

where  $c$  is a constant,  $n(r)$  is the radius  $r$  distribution of pores,  $\nu(r)$  is the volume of each pore,  $F(qr)$  is the form factor of pore (i.e., spherical form factor), and  $S(qr)$  is the structure factor of pores where  $q$  is the magnitude of scattering vector  $\mathbf{q}$ . For a hard sphere (i.e., spherical pore with a radius  $r$ ), the form factor  $F(qr)$  in eq 2 can be expressed in the following equation:<sup>6,7</sup>

$$F(qr) = 4\pi r^2 \cdot \frac{\sin(qr) - qr \cos(qr)}{q^3 r^3} \quad (3)$$

For hard spheres (i.e., pores) monodispersed locally, their structure factor  $S(qr)$  can be expressed by the following equation:<sup>8</sup>

$$S(qr) = \frac{1}{1 + 24\phi_p \cdot \frac{G(A)}{A}} \quad (4)$$

where  $A = 2qr$  and  $\phi_p$  is the volume fraction of pores.  $G(A)$  is given as

$$G(A) = \frac{\alpha}{A^2} (\sin A - A \cos A) + \frac{\beta}{A^3} [2A \sin A + (2 - A^2) \cos A - 2] \\ + \frac{\gamma}{A^5} \{-A^4 \cos A + 4[(3A^2 - 6) \cos A + (A^3 - 6A) \sin A + 6]\} \quad (5)$$

where

$$\alpha = \frac{(1 + 2\phi_p)^2}{(1 - \phi_p)^4} \quad (6a)$$

$$\beta = -6\phi_p \cdot \frac{(1 + \phi_p/2)^2}{(1 - \phi_p)^4} \quad (6b)$$

$$\gamma = \frac{\phi_p(1 + 2\phi_p)^2}{2(1 - \phi_p)^4} \quad (6c)$$

In the data analysis, we found that the pores have a radius distribution following a lognormal function:<sup>1-5</sup>

$$n(r) = \frac{1}{\sqrt{2\pi} r_o \sigma e^{\sigma^2/2}} e^{\frac{-\ln(r/r_o)^2}{2\sigma^2}} \quad (7)$$

where  $r_o$  and  $\sigma$  are the radius corresponding to the peak maximum and the width of the radius distribution of the pores respectively.

All GIXS data were successfully analyzed using the GIXS formula (eq 1) together with eq 2-7. The data analysis results are shown in Fig. 1 and Table 2.

## References

- 1 B. Lee, J. Yoon, W. Oh, Y. Hwang, K. Heo, K. S. Jin, J. Kim, K.-W. Kim and M. Ree, *Macromolecules*, 2005, **38**, 3395-3405.
- 2 Y. Rho, B. Ahn, J. Yoon and M. Ree, *J. Appl. Crystallogr.*, 2013, **46**, 466-475.
- 3 B. Lee, Y.-H. Park, Y.-T. Hwang, W. Oh, J. Yoon, M. Ree, *Nat. Mater.*, 2005, **4**, 147-150.
- 4 B. Lee, W. Oh, Y. Hwang, Y.-H. Park, J. Yoon, K. S. Jin, K. Heo, J. Kim, K.-W. Kim and M. Ree, *Adv. Mater.*, 2005, **17**, 696-701.
- 5 K. Heo, S.-G. Park, J. Yoon, K. S. Jin, S. Jin, S.-W. Rhee and M. Ree, *J. Phys. Chem. C*, 2007, **111**, 10848-10854.
- 6 J. S. Pedersen, *J. Appl. Crystallogr.*, 1994, **27**, 595-608.
- 7 Y. J. Roe, *Methods of X-ray and Neutron Scattering in Polymer Science*, Oxford University Press, New York, 2000.
- 8 D. J. Kinning and E. L. Thomas, *Macromolecules*, 1984, **17**, 1712-1718.
